# Supplementary material
Source: PubMed Central journal article supplement (PMC9588642)

Cell Host & Microbe, Volume 30

**Supplemental information**

**A dissemination-prone morphotype  
enhances extrapulmonary organ entry  
by *Cryptococcus neoformans***

**Steven T. Denham, Brianna Brammer, Krystal Y. Chung, Morgan A. Wambaugh, Joseph M. Bednarek, Li Guo, Christian T. Moreau, and Jessica C.S. Brown**

**Supplemental Figure 1: Flow cytometry tracks *C. neoformans* populations shifting toward smaller cell size in the lungs.** Related to Figure 2. Representative flow cytometry plots from mice inoculated with  $10^4$  KN99-mCherry cells / mouse.

**Supplemental Figure 2: DNA content of *ex vivo* *C. neoformans* populations.** Related to Figure 2. Percentage of cells with 1C, 2C, and >2C DNA content in the indicated population. Values correspond to the representative flow cytometry plot in Figure 2E. Bar graphs display the mean.

**Supplemental Figure 3: Representative flow cytometry plots for opsonization and macrophage depletion efficiency.** Related to Figure 3. **(A)** Representative flow cytometry plot showing single cell gating performed prior to analyzing opsonization of *ex vivo* cell populations (**Fig. 3A**). **(B)** Flow cytometry plots for small, intermediate **(C)**, and large **(D)** *ex vivo* cells stained with lectins or antibodies to detect cell surface binding. **(E)** Representative flow cytometry plots displaying the frequency of CD45<sup>+</sup>, F4/80<sup>+</sup> macrophages in the liver and spleen after treatment with either PBS (control) liposomes or clodronate liposomes. **(F)** Quantification of macrophage depletion measured as the ratio of macrophages in clodronate-treated mice to PBS-treated mice. **(G)** Colony forming units (CFU) of data in **Figure 3H**. Mann-Whitney U-test, compared to PBS control; N=6 mice per group. ns: not significant \*p<0.05; \*\*p<0.01; \*\*\*p<0.001; \*\*\*\*p<0.0001. Bar graphs display the mean. Inset (box) is CFU in the brain.

**Supplemental Figure 4: Depletion of platelets or neutrophils does not affect the dissemination of small *ex vivo* cells.** Related to Figure 3. **(A)** Fungal burden in mice, measured by colony forming units (CFU), following treatment with PBS (control) or anti-GPIIb $\alpha$  antibody to deplete platelets prior to intravenous inoculation with  $10^5$  small *ex vivo* cells / mouse. **(B)** Platelet count (K: units) in the blood before and after treatment with PBS (control) or anti-GPIIb $\alpha$  antibody. **(C)** Quantification of platelet depletion in Figure S4B. **(D)** Fungal burden in mice treated with PBS (control) or anti-Ly6G antibody to deplete neutrophils prior to intravenous inoculation with  $10^5$  small *ex vivo* cells / mouse. **(E)** Representative flow cytometry plots displaying the frequency of CD45<sup>+</sup>, Ly6C<sup>+</sup>, Ly6G<sup>+</sup> neutrophils in the blood after treatment with either PBS (control) or anti-Ly6G antibody. **(F)** Quantification of neutrophil depletion measured as the ratio of neutrophils in anti-Ly6G antibody-treated mice to PBS-treated mice. All comparisons in Figure S4 were analyzed using unpaired t-tests (ns: not significant \*p<0.05; \*\*p<0.01; \*\*\*p<0.001; \*\*\*\*p<0.0001). All bar graphs display the mean.

**Supplemental Figure 5: Screen for factors that induce cell size reduction.** Related to Figure 6. **(A)** Fungal cell size measured by forward scatter-area (FSC-A). Cells were cultured in capsule inducing medium (CAP medium) buffered to pH 7.4 or 6.3 before subculture (1:1) in fresh medium with 10% of the final volume being the indicated supplement solubilized in H<sub>2</sub>O (CM: conditioned medium; GXM: glucuronoxylomannan; YNB: minimal YNB medium; PBS: phosphate buffered saline). Comparisons in Figure S5A were analyzed using one-way ANOVA and uncorrected Fisher's LSD (ns: not significant; \*p<0.05; \*\*p<0.01; \*\*\*p<0.001; \*\*\*\*p<0.0001). All bar graphs display the mean and error bars indicate standard deviation. **(B)** Cell body diameter and **(C)** capsule thickness of cells cultured in capsule inducing medium (CAP medium) buffered to pH 7.4 or 6.3 before subculture (1:1) in fresh medium with the addition of a putative inducing factor. For H<sub>2</sub>O, CM, or YNB, the inducing factor was 10% of the final volume. (CM: conditioned medium; YNB: minimal YNB medium). **(D)** Cell body diameter and **(E)** capsule thickness measurements at 3, 10, and 17 days post-intranasal inoculation (dpi) of mice (Mann-Whitney U test; N=6 mice per time point; 50, 100, and 150 wild-type cells measured per mouse at days 3, 10, and 17 respectively. 50, 50, and 100 *pho4Δ* mutant cells measured per mouse at days 3, 10, and 17 respectively). Solid lines in the violin plots indicate the median and dotted lines mark quartiles. All comparisons in Figure S5B-E were analyzed using Mann-Whitney U-tests; N=200 fungal cells (ns: not significant; \*p<0.05; \*\*p<0.01; \*\*\*p<0.001; \*\*\*\*p<0.0001). **(F)** Representative India ink images of fungal cells quantified in Fig. 6G. Scale bars represent 20 μm. **(G)** Nanomoles of phosphate cells grown in YNB, CAP-medium (pH 6.8 or pH 7.4)

**Supplemental Figure 6: Multiple sources of phosphate are sufficient to induce cell body diameter and capsule thickness reduction.** Related to Figure 7. Total diameter measurements of CAP-grown cells (pH 6.8 in **A**, pH 7.4 in **B**) after exposure to ATP, CTP, GTP, UTP at 200 μM or a pool of NTPs sy 200 μM total concentration (50 μM each of adenine, cysteine, guanine, and uridine triphosphates). **(C)** Capsule thickness (calculated using the formula (total diameter – cell body diameter)/2)) of CAP-grown cells (pH 6.8 on left, pH 7.4 on right) induced to form small cells in guano medium. **(D)** Cell body diameter of CAP-grown cells (pH 6.8 on left, pH 7.4 on right) induced to form small cells in guano medium. **(E)** Total diameter measurements of wild-type or *pho4Δ* cells grown in capsule-inducing medium (pH 7.4) or induced to form small cells (+ guano). P-values calculated using Mann-Whitney test; N = 3 biological replicates per experiment and >100 cells measured per replicate. The solid line represents the population median and the dotted lines the 25<sup>th</sup> and 75<sup>th</sup> percentiles. The solid

line represents the population median and the dotted lines the 25<sup>th</sup> and 75<sup>th</sup> percentiles. All comparisons marked as significant represent populations for which the 95% confidence interval does not overlap. \*\*\*\* $p < 0.0001$ .

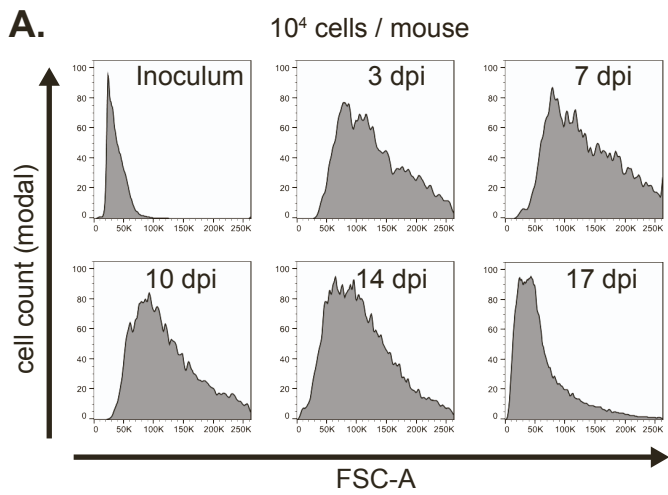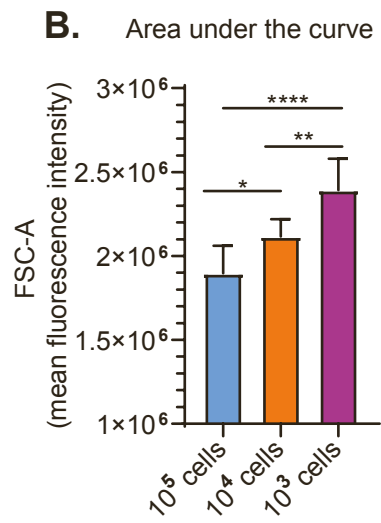

DNA Ploidy

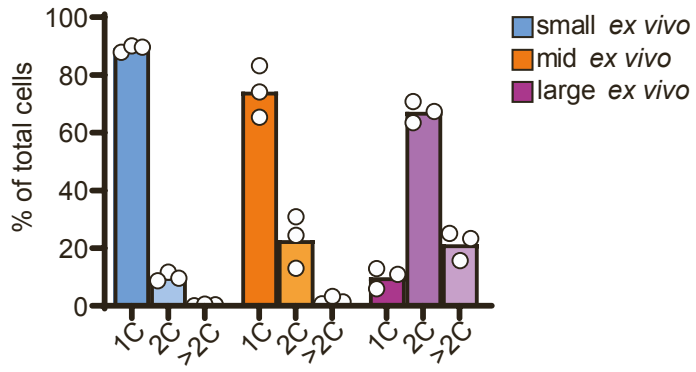

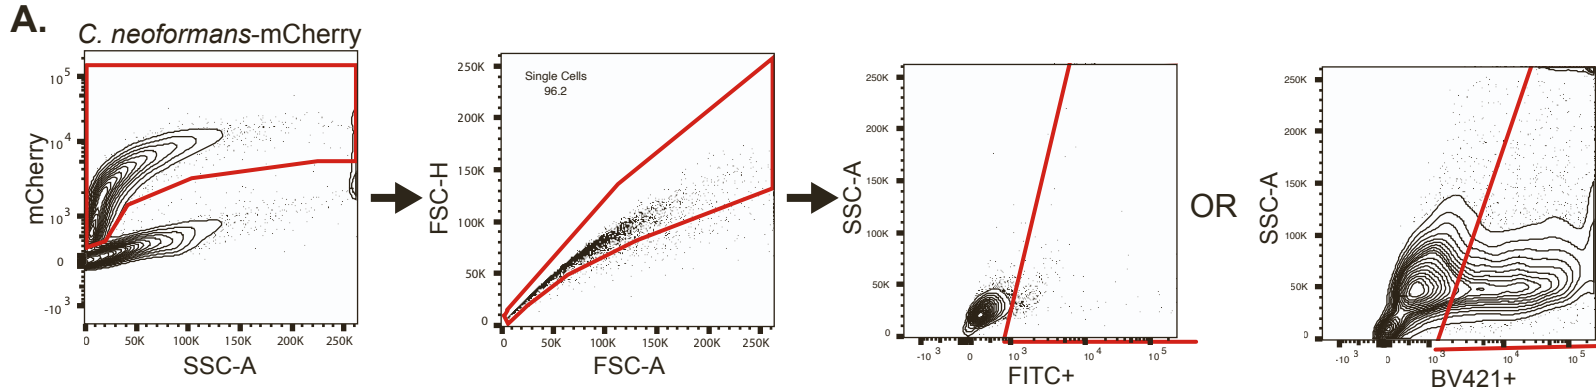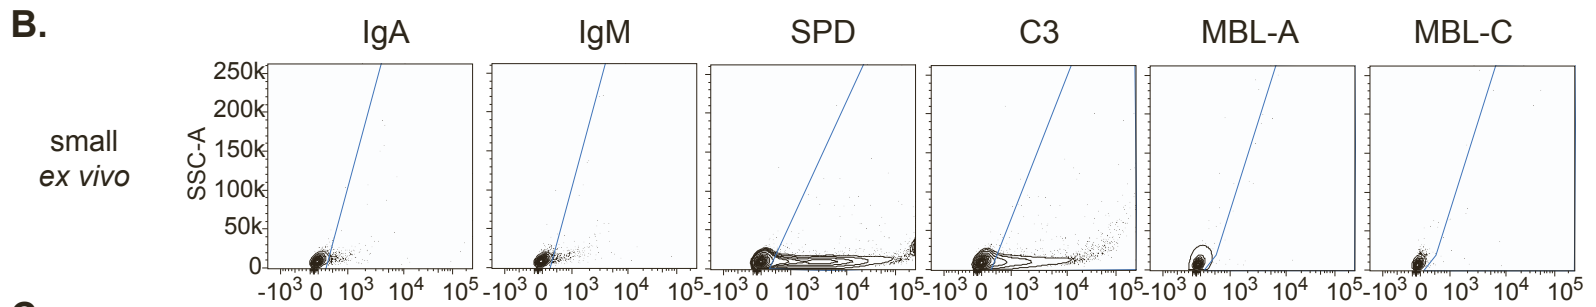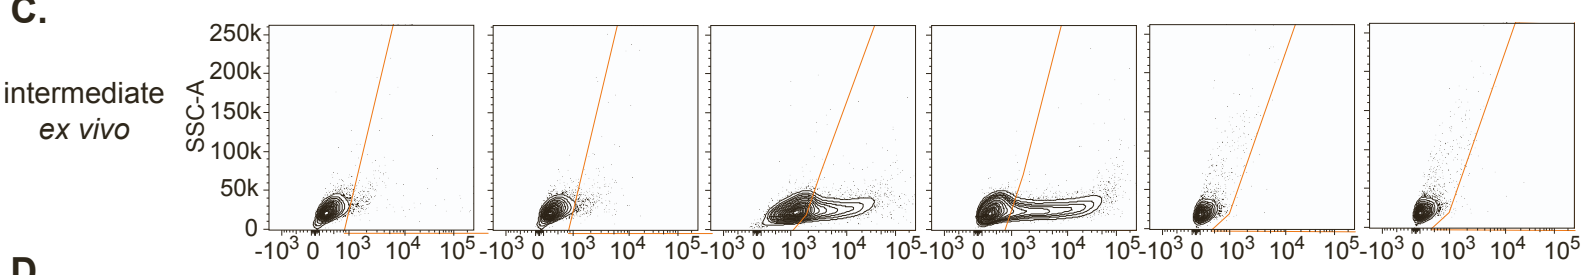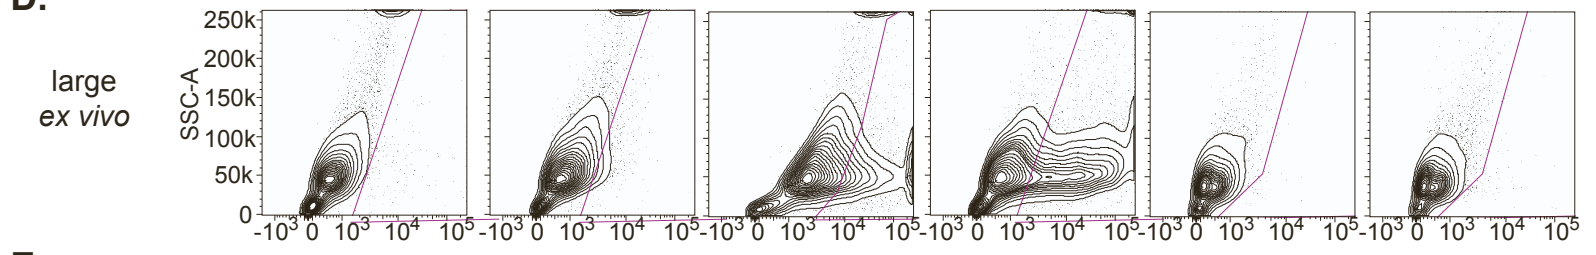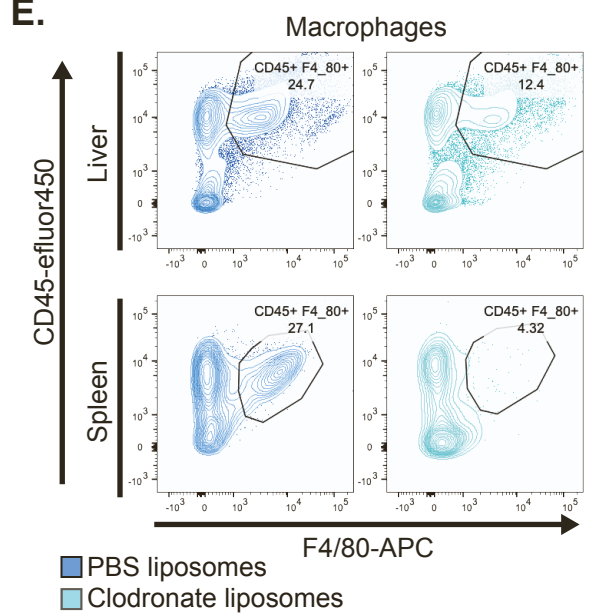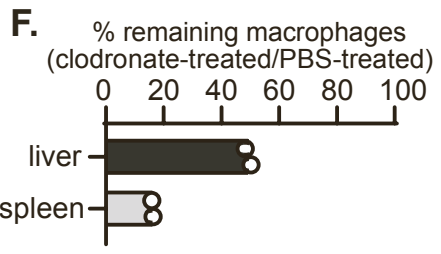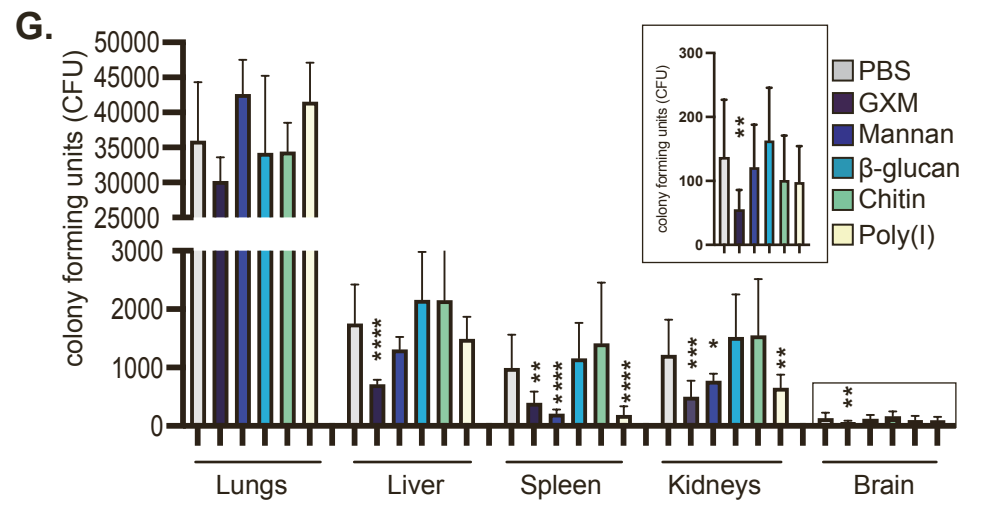

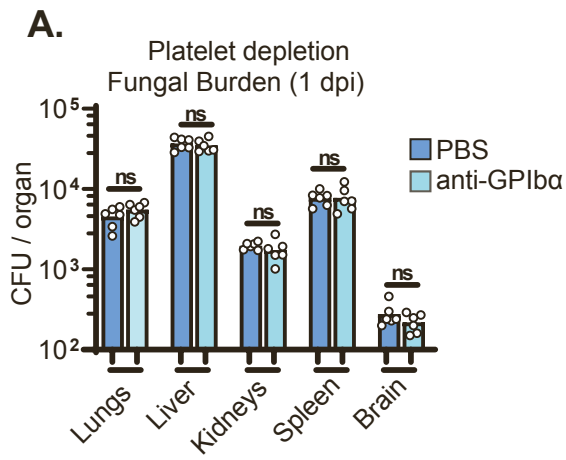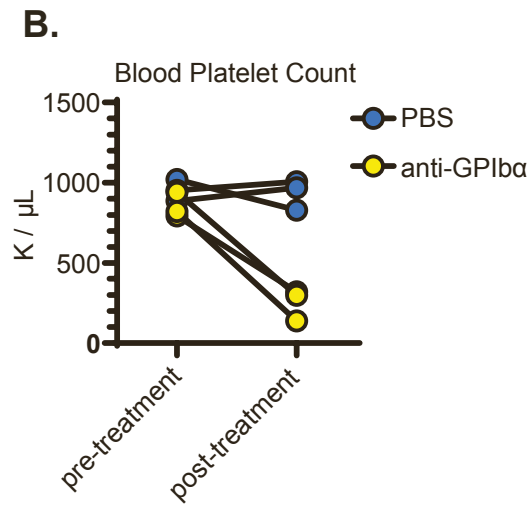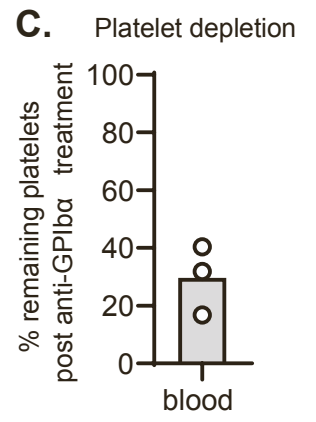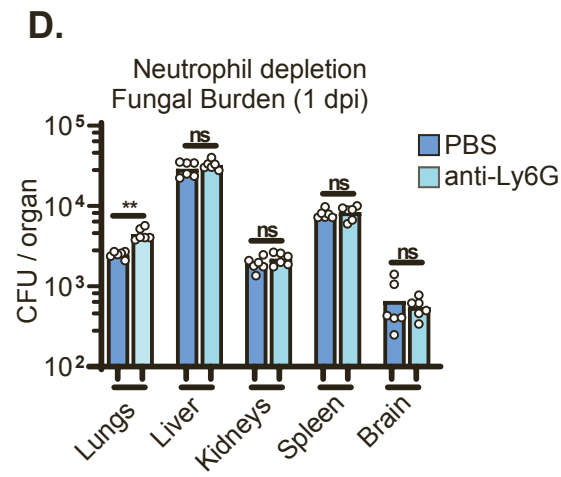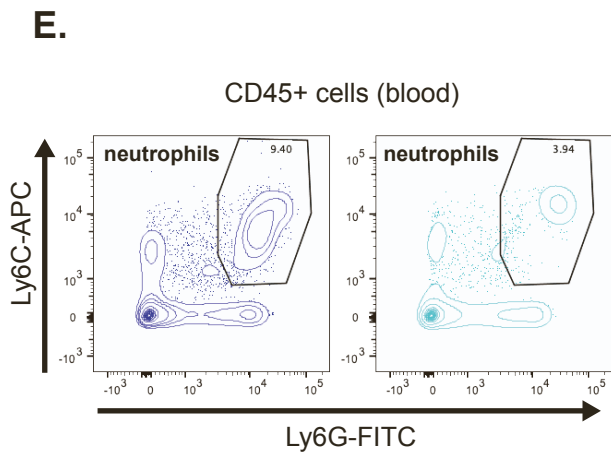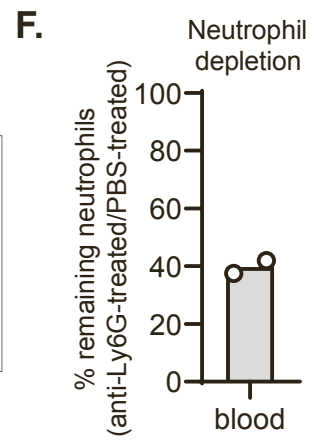



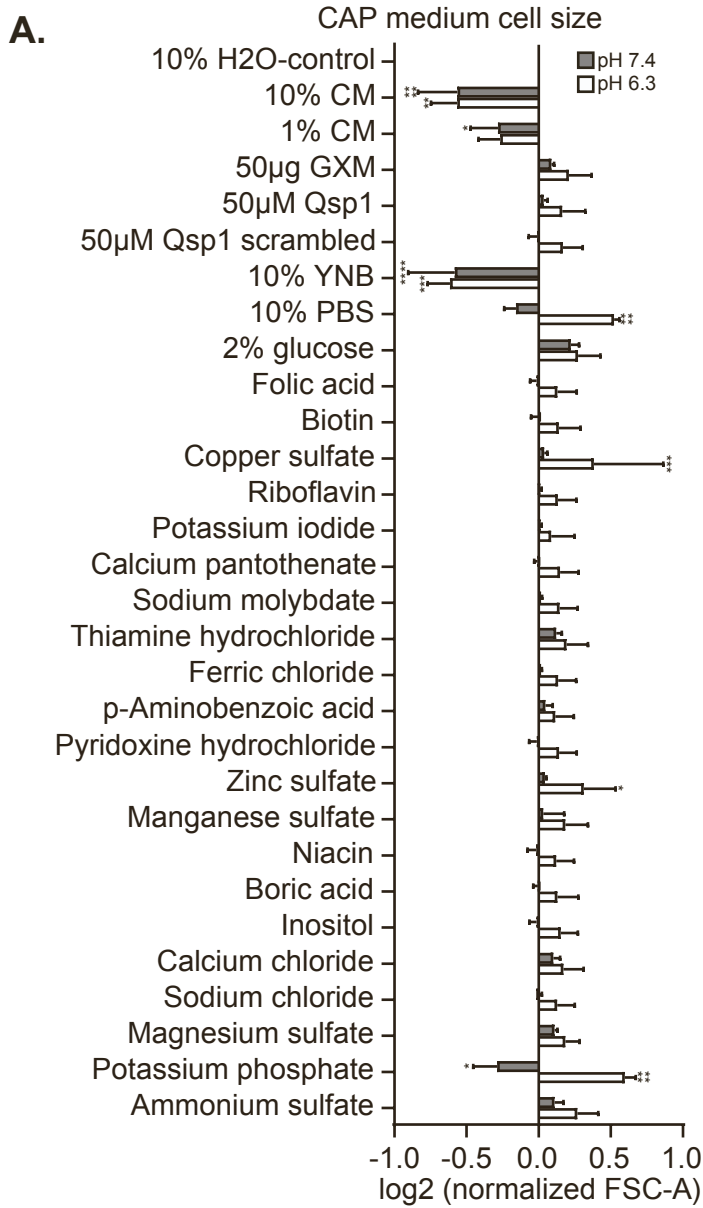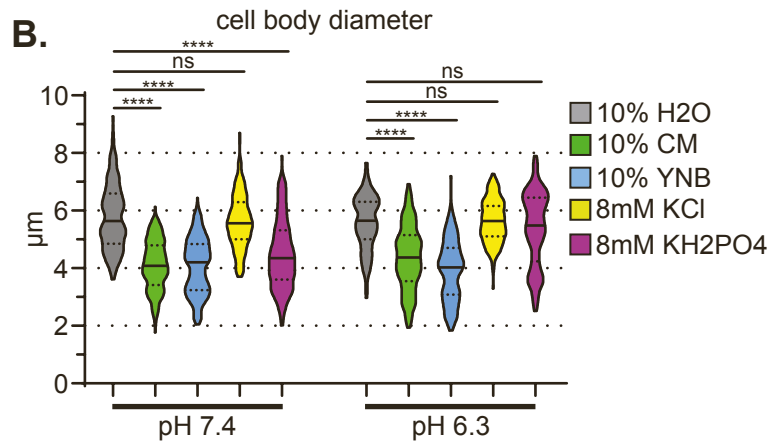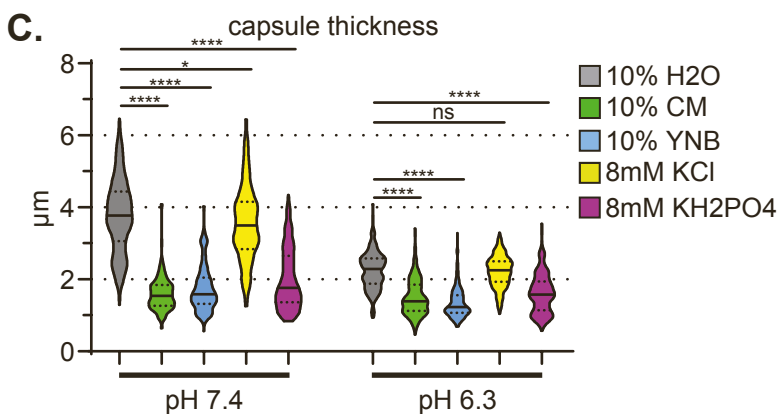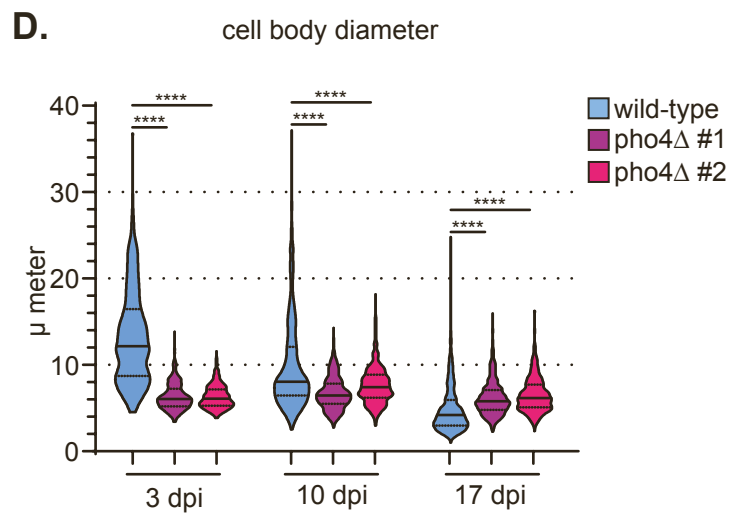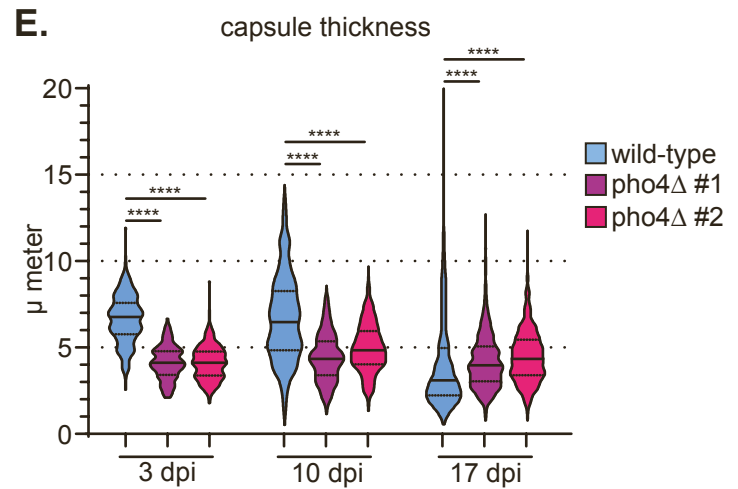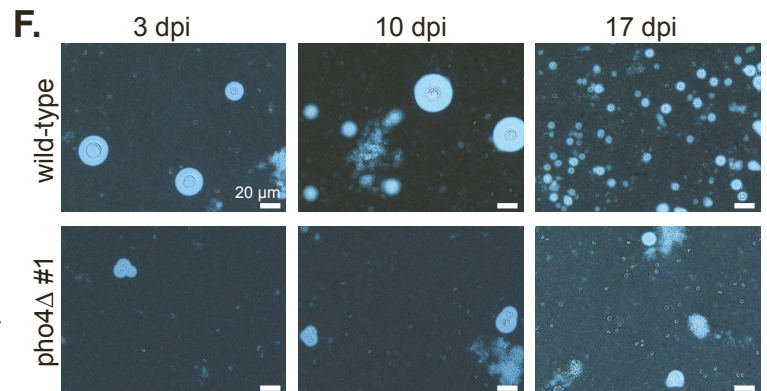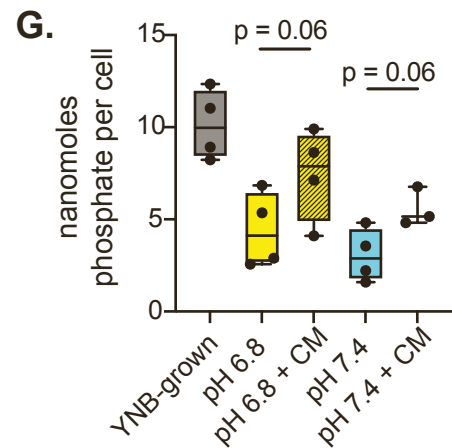

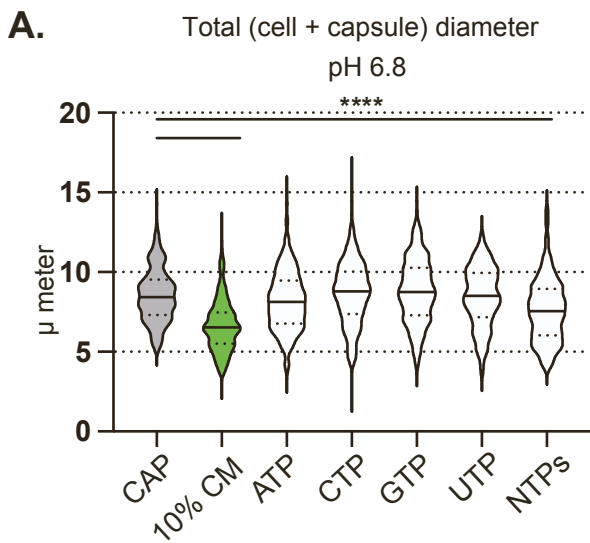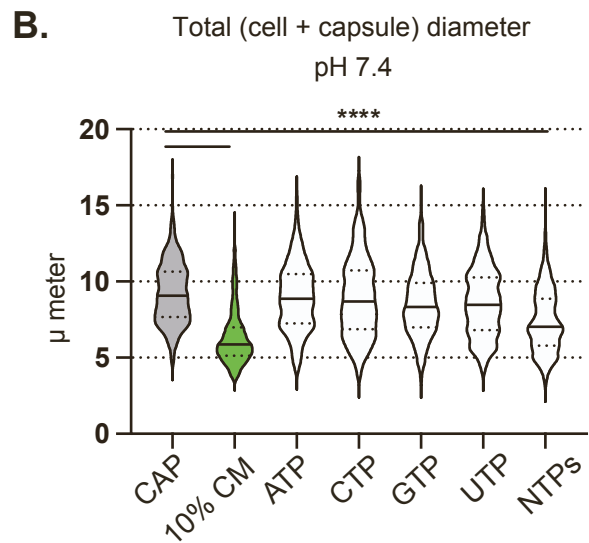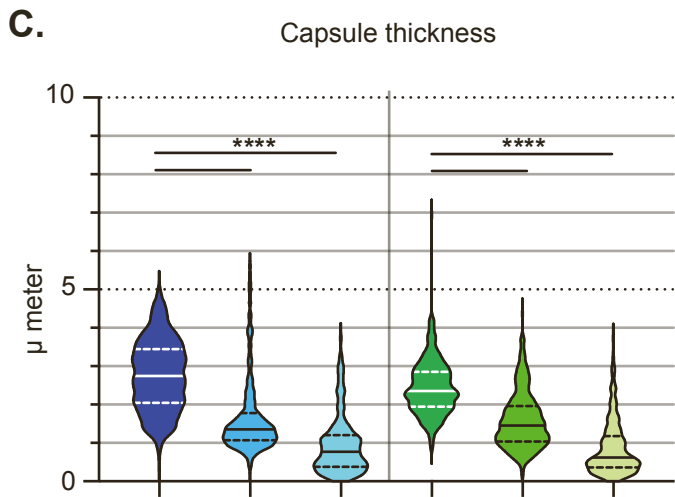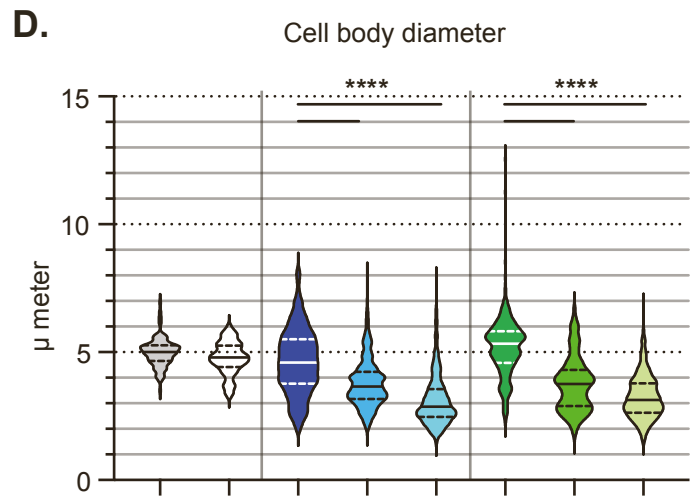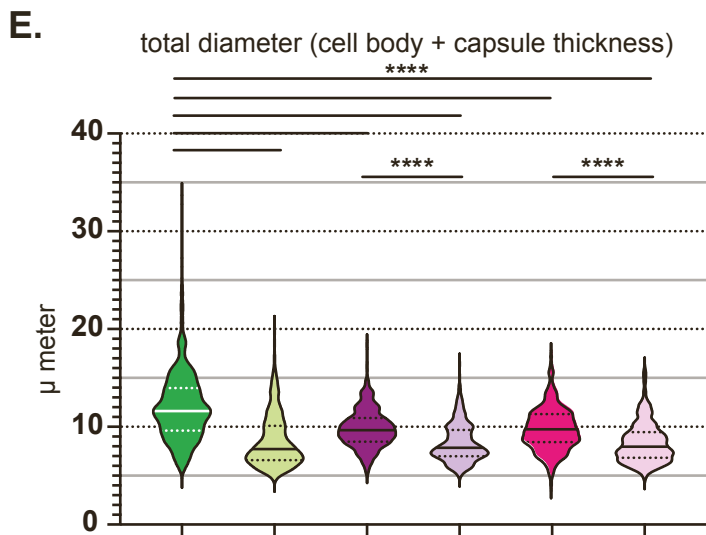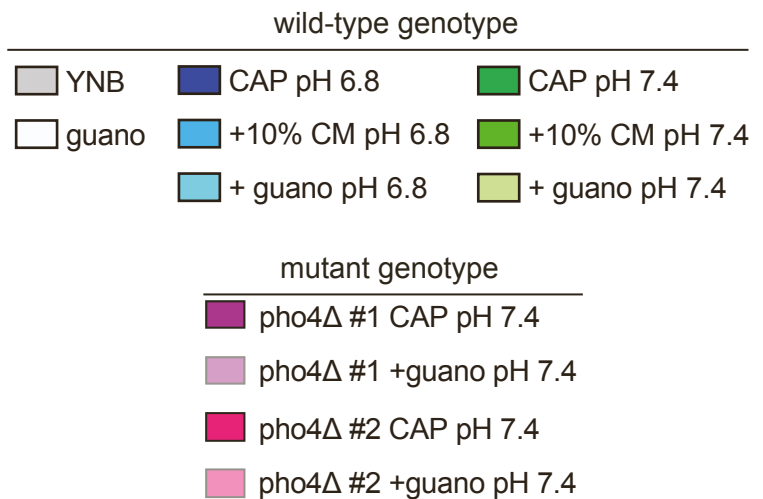

Supplement: NIHMS1833352-supplement-mmc1.pdf [file NIHMS1833352-supplement-mmc1.pdf]
